# Supplementary material for: Enzymatic Protein Immobilization on Amino-Functionalized Nanoparticles
Source: MDPI journal article supplement (doi:10.3390/molecules28010379), 2023-01-02
Supplement: s1 [file s1]

---

## Supporting information

### Enzymatic Protein Immobilization on Amino-functionalized Nanoparticles

#### Estimation of the number of proteins immobilized on nanoparticles:

The total mass of Fe<sub>3</sub>O<sub>4</sub>: m= 12 mg.

Assuming the Fe<sub>3</sub>O<sub>4</sub> nanoparticle is a regular sphere, the mass of a single Fe<sub>3</sub>O<sub>4</sub> nanoparticle:  $m_{\text{single}} = \rho \cdot V = 5.18 \text{ g/cm}^3 \times (4/3) \times \pi \times (9.62 \text{ nm}/2)^3 = 2.4 \times 10^{-15} \text{ mg}$ .

The total Fe<sub>3</sub>O<sub>4</sub> nanoparticles is:  $N_{\text{total}} = 12 \text{ mg} / 2.4 \times 10^{-15} \text{ mg} = 5 \times 10^{15}$ .

The molar amount of catechol-PEG5000-NH<sub>2</sub>:  $n = 55 \text{ mg} / 5500 \text{ g/mol} = 0.01 \text{ mmol}$ .

The concentration of catechol-PEG5000-NH<sub>2</sub>:  $c = 0.01 \text{ mmol} / 5 \times 10^{-3} \text{ L} = 2 \text{ mM}$ .

The number of catechol-PEG5000-NH<sub>2</sub>:  $N_{\text{PEG}} = 0.01 \text{ mmol} \times N_A \times 10^{-3} = 6.02 \times 10^{18}$ .

The number of catechol-PEG5000-NH<sub>2</sub> on a Fe<sub>3</sub>O<sub>4</sub> nanoparticle:  $N_{\text{particle}} = 6.02 \times 10^{18} / 5 \times 10^{15} = 1.2 \times 10^3$ .

The number of eGFP-ELP<sub>8</sub>-NGL on a Fe<sub>3</sub>O<sub>4</sub> nanoparticle:  $N_{\text{protein}} = 1.2 \times 10^3 \times 2 \times 10^{-2} = 24$ .

#### Protein sequence

eGFP-ELP<sub>8</sub>-NGL (MW: ~33 kDa)

MGHHHHHMHVSKGEELFTGVVPILVELDGDVNGHKFSVSGEGEGDATYGKL  
TLKFICTTGKLPVPWPTLVTTLTYGVCFSRYPDHMKQHDFFKSAMPEGYVQ  
ERTIFFKDDGNYKTRAEVKFEGLTLVNRIELKGIDFKEDGNILGHKLEYNYS  
HNVIYIMADKQKNGIKVNFKIRHNIEDGSVQLADHYQQNTPIGDGPVLLPDNH  
YLSTQSALS KDPNEKRDHMLLEFVTAAGITLGMDELYKRSVPGVGPVGVP  
PGEVPGVGPVGVPVGVPVGVPGEVPGGLRSNGL

The fluorescence emission spectrum excited at 488 nm was shown in figure S7.

GL-eGFP (MW: ~29 kDa)

MGLHHHHHHGSMVSKGEELFTGVVPILVELDGDVNGHKFSVSGEGEGDATY  
GKLTLKFICTTGKLPVPWPTLVTTLTYGVCFSRYPDHMKQHDFFKSAMPEG  
YVQERTIFFKDDGNYKTRAEVKFEGLTLVNRIELKGIDFKEDGNILGHKLEYN  
YNSHNVIYIMADKQKNGIKVNFKIRHNIEDGSVQLADHYQQNTPIGDGPVLLP  
DNHYLSTQSALS KDPNEKRDHMLLEFVTAAGITLGMDELYKRS

## Supplementary Figures

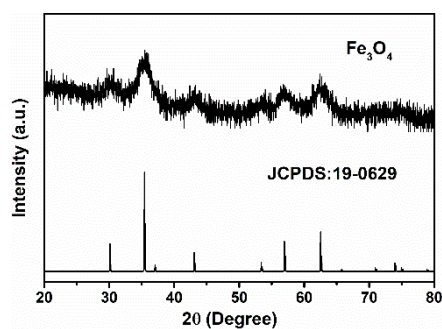

Figure S1. XRD patterns of the obtained Fe<sub>3</sub>O<sub>4</sub> and standard diffraction peaks of Fe<sub>3</sub>O<sub>4</sub> (JCPDS NO.19-0629).

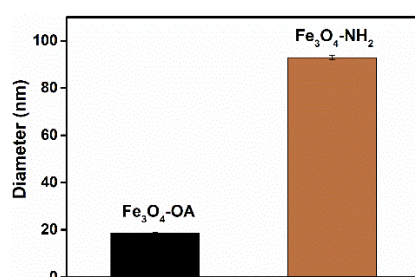

Figure S2. Average diameter of Fe<sub>3</sub>O<sub>4</sub>-OA and Fe<sub>3</sub>O<sub>4</sub>-NH<sub>2</sub> measured by DLS.

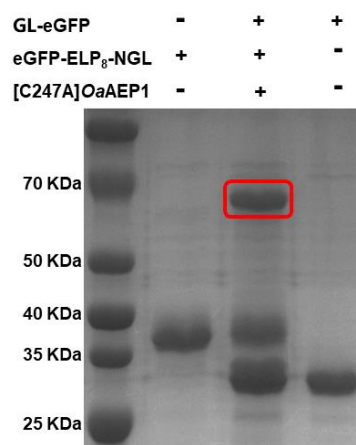

Figure S3. SDS-PAGE gel result of the ligation of eGFP-ELP<sub>8</sub>-NGL with protein GL-eGFP by *OaAEP1*.

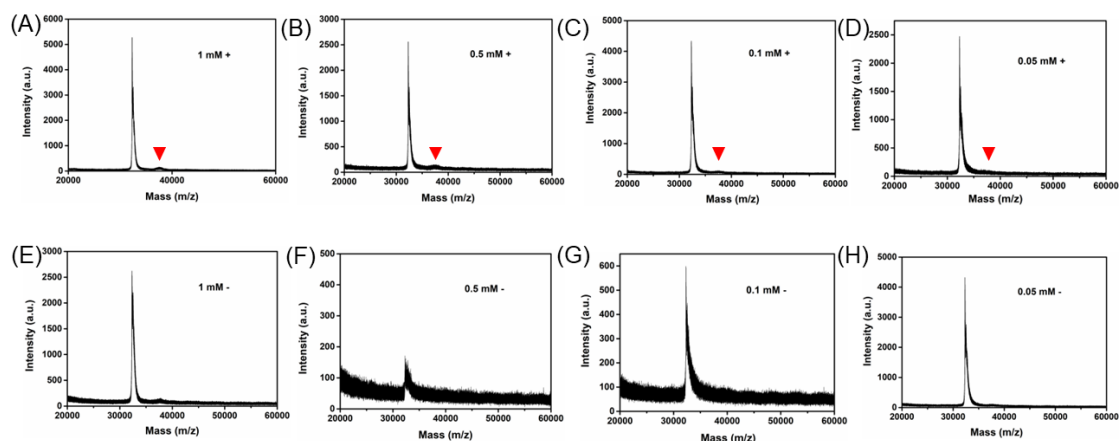

Figure S4. MALDI-TOF MS result of the ligation of eGFP-ELP<sub>8</sub>-NGL with PEG5000-NH<sub>2</sub> (A, E 1 mM; B, F 0.5 mM; C, G 0.1 mM; D, H 0.05 mM) when *OaAEP1* was present (upper) and absent (bottom).

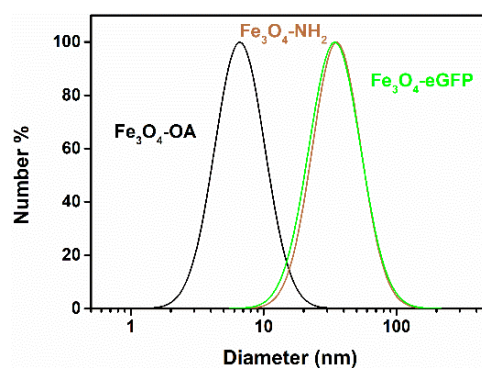

Figure S5. Hydrodynamic diameter distribution of Fe<sub>3</sub>O<sub>4</sub>-OA, Fe<sub>3</sub>O<sub>4</sub>-NH<sub>2</sub>, Fe<sub>3</sub>O<sub>4</sub>-eGFP.

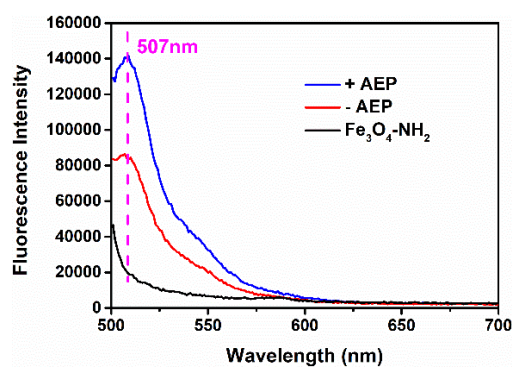

Figure S6. The fluorescence emission spectra of Fe<sub>3</sub>O<sub>4</sub>-NH<sub>2</sub> (black) and the obtained Fe<sub>3</sub>O<sub>4</sub>-eGFP complex when *OaAEP1* was present (blue) and absent (red).

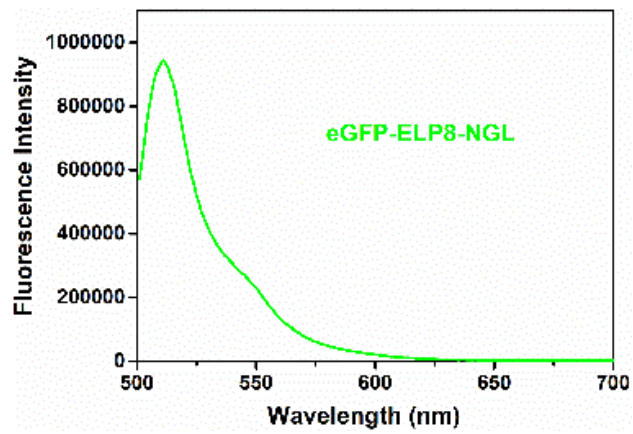

Figure S7. The fluorescence emission spectrum of target protein eGFP-ELP<sub>8</sub>-NGL excited at 488 nm, which is same as free eGFP.
